# Supplementary material for: Identification and fine mapping of Bph33, a new brown planthopper resistance gene in rice (Oryza sativa L.)
Source: PubMed Central journal article supplement (PMC6173673; doi:10.1186/s12284-018-0249-7), 2018-10-05
Supplement: 12284_2018_249_MOESM3_ESM.pdf [file 12284_2018_249_MOESM3_ESM.pdf]

LOC\_Os04g02510

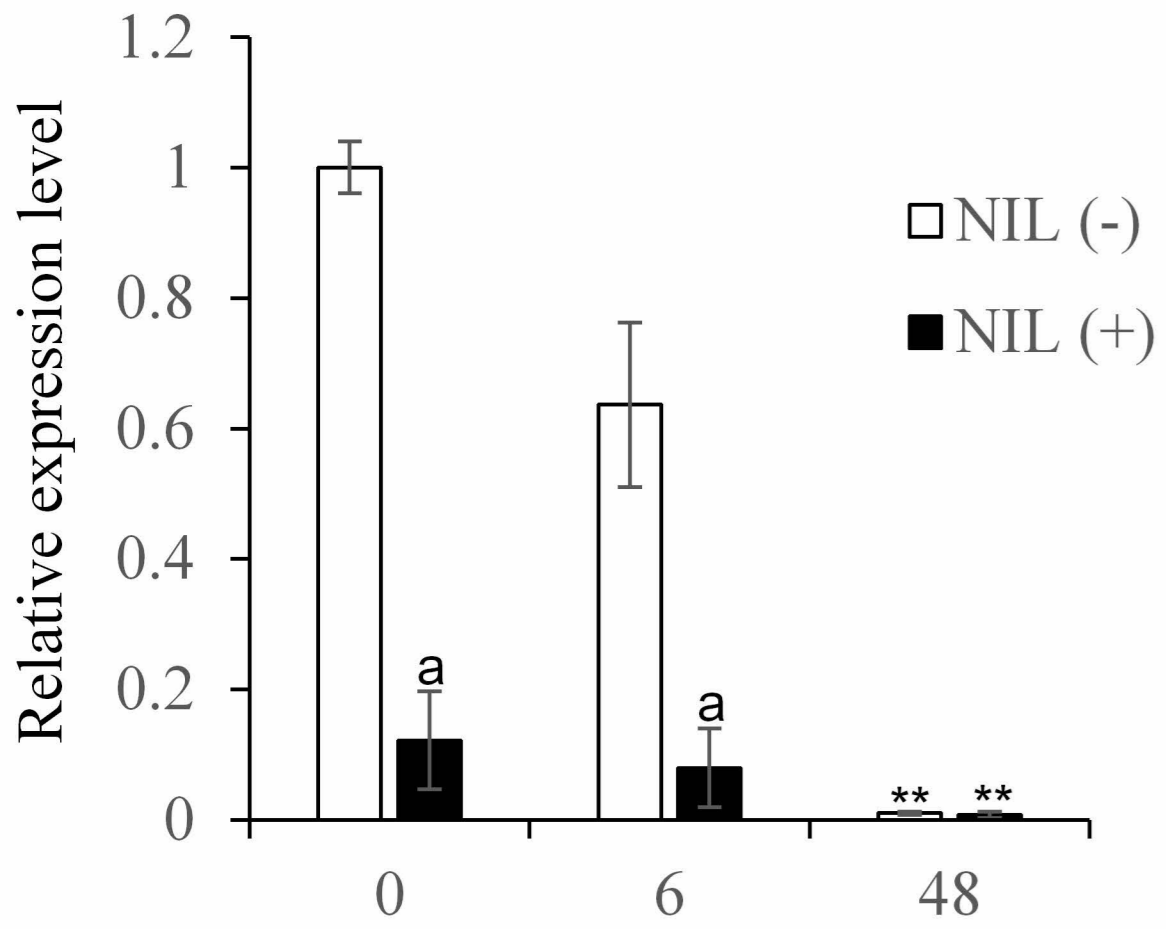

LOC\_Os04g02520

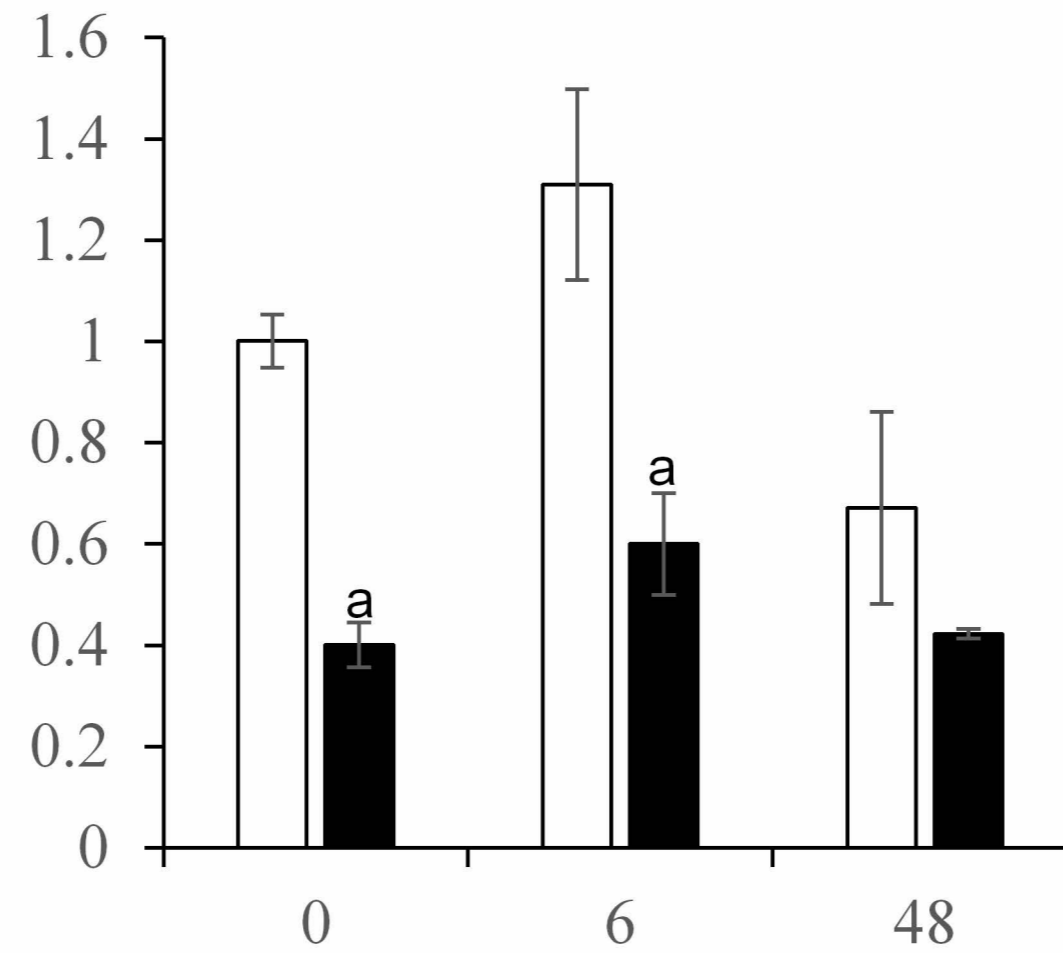

LOC\_Os04g02530

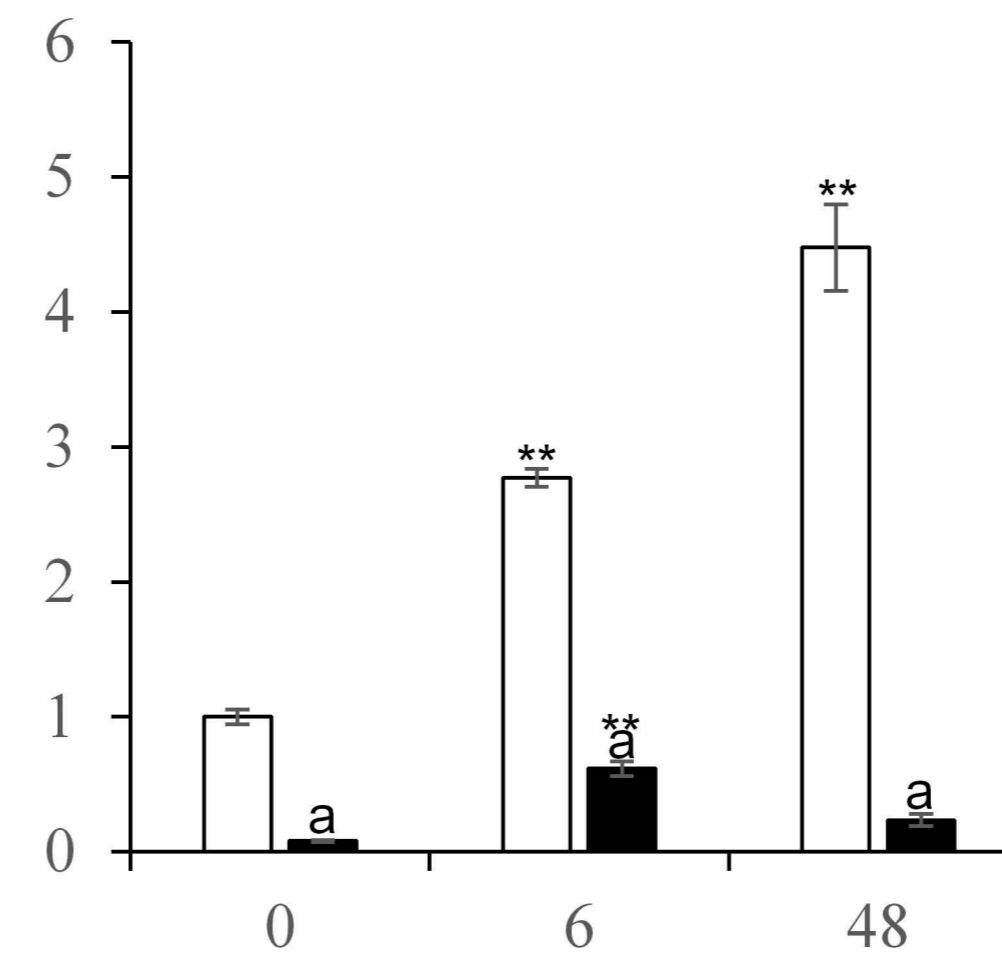

LOC\_Os04g02550

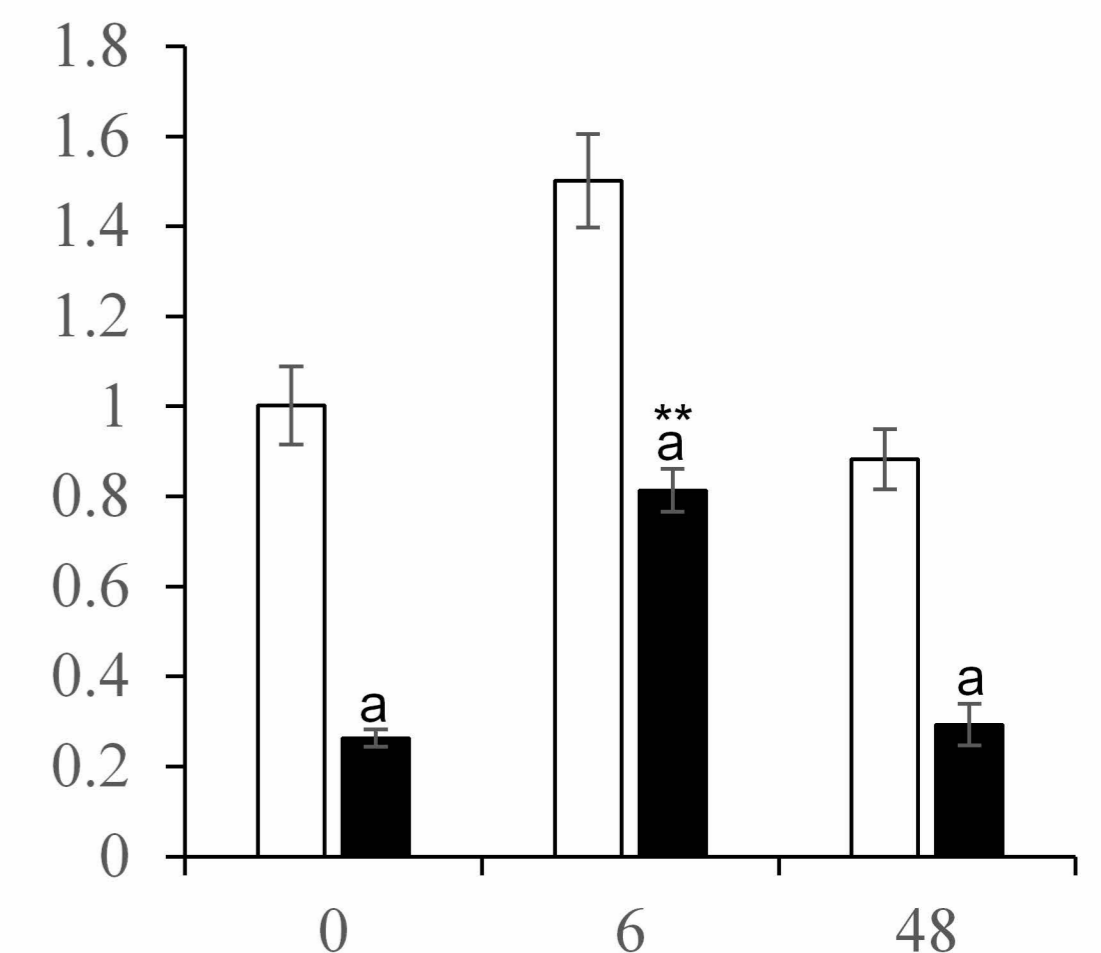

Hours after BPH infestation

LOC\_Os04g02560

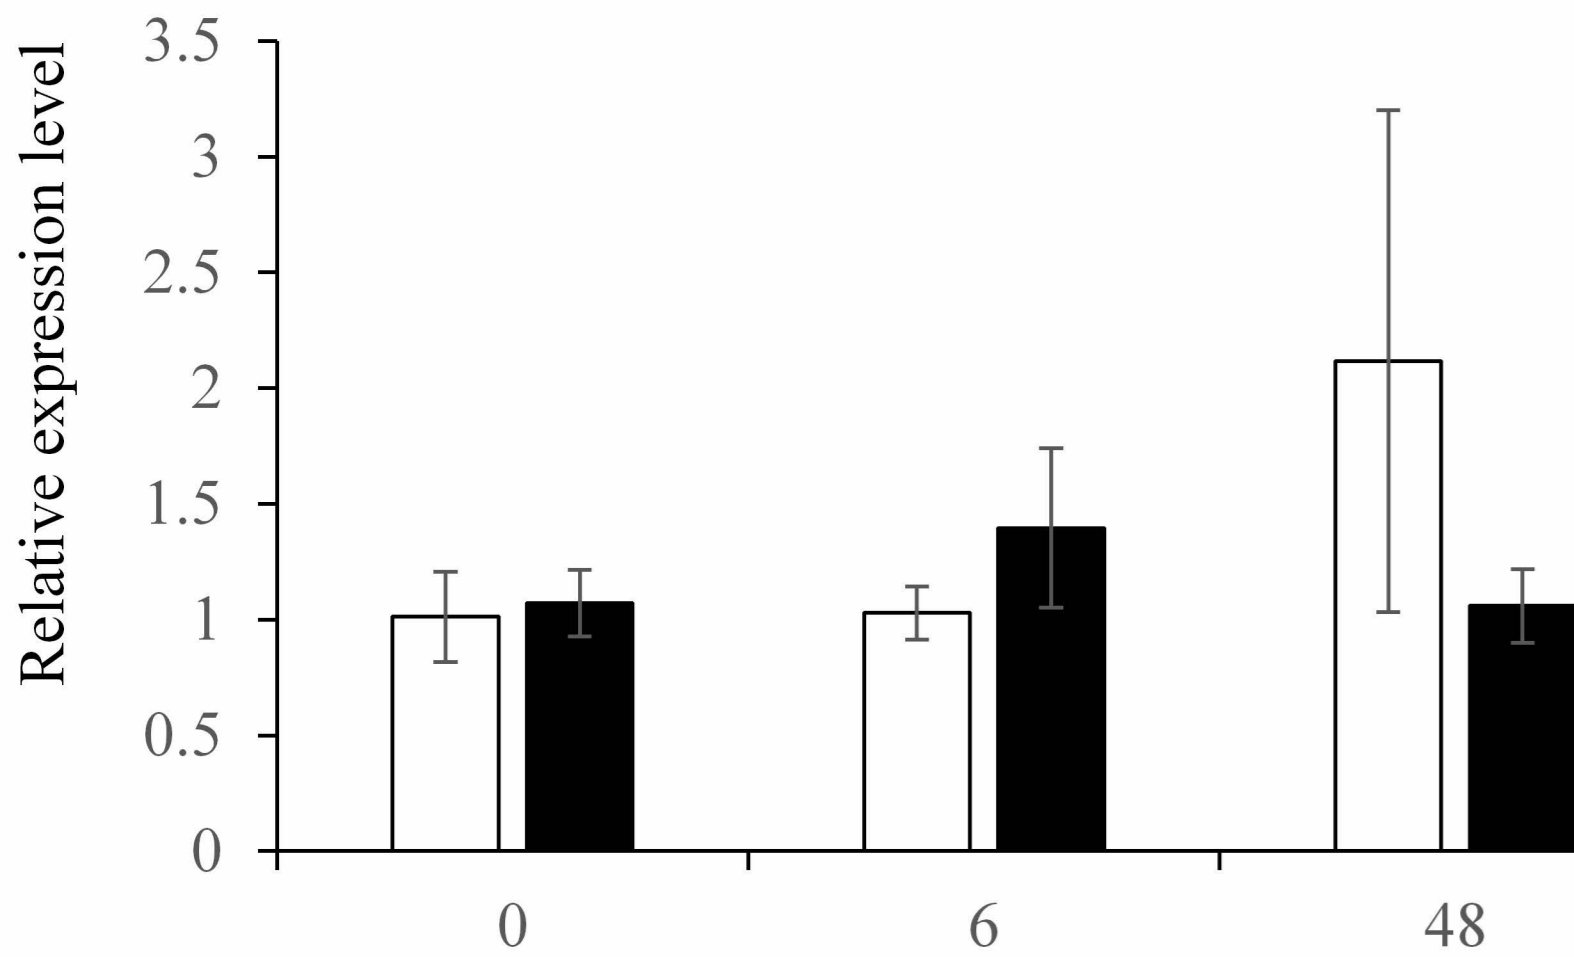

LOC\_Os04g02570

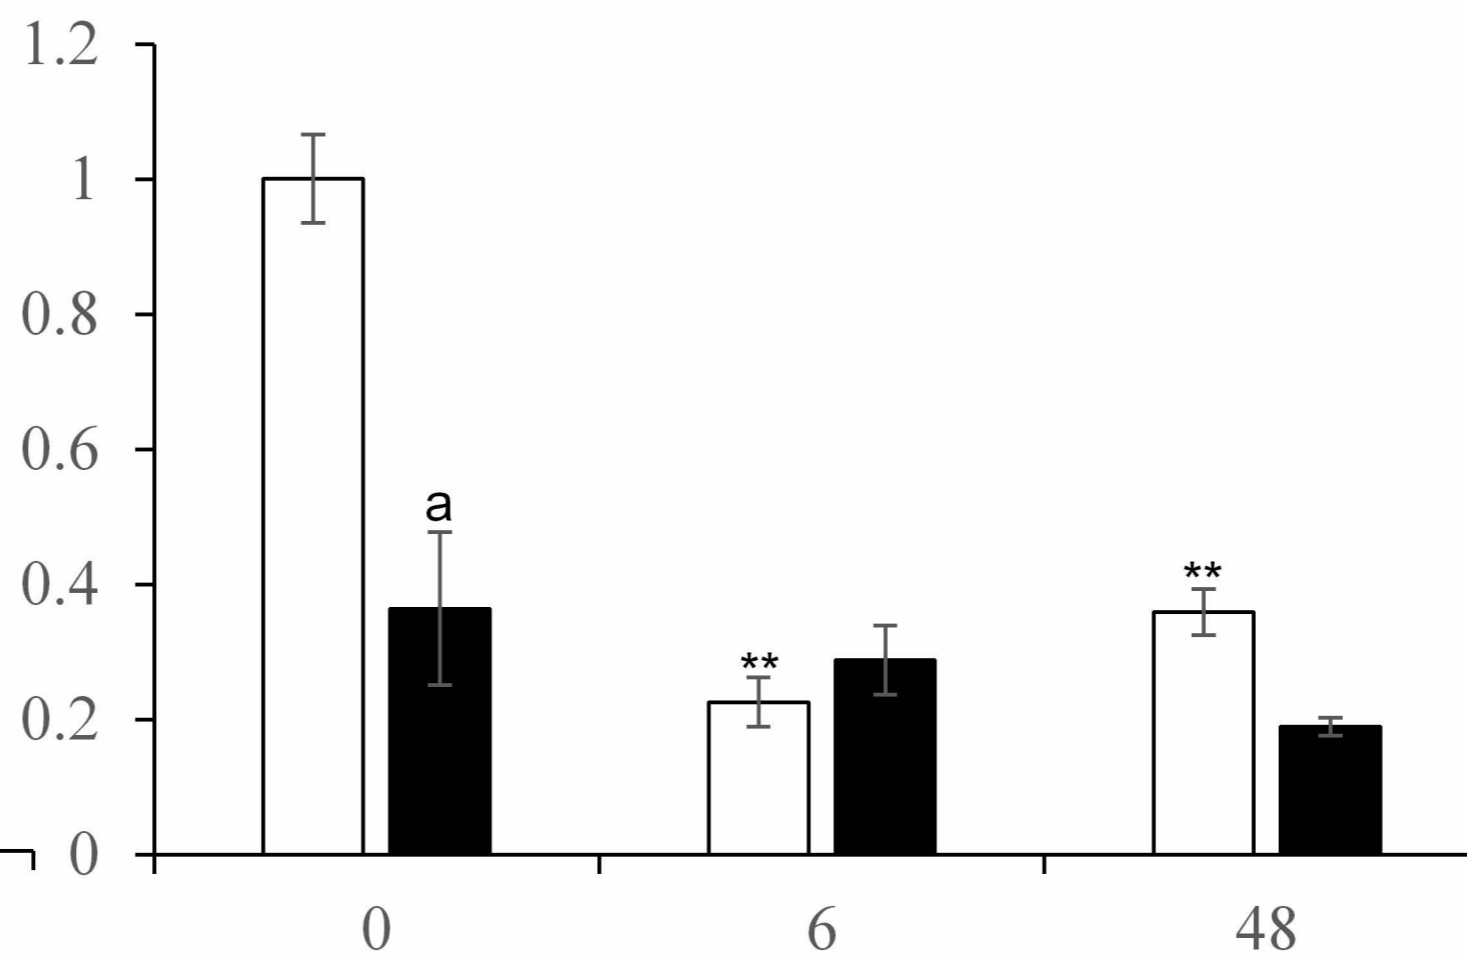

LOC\_Os04g02580

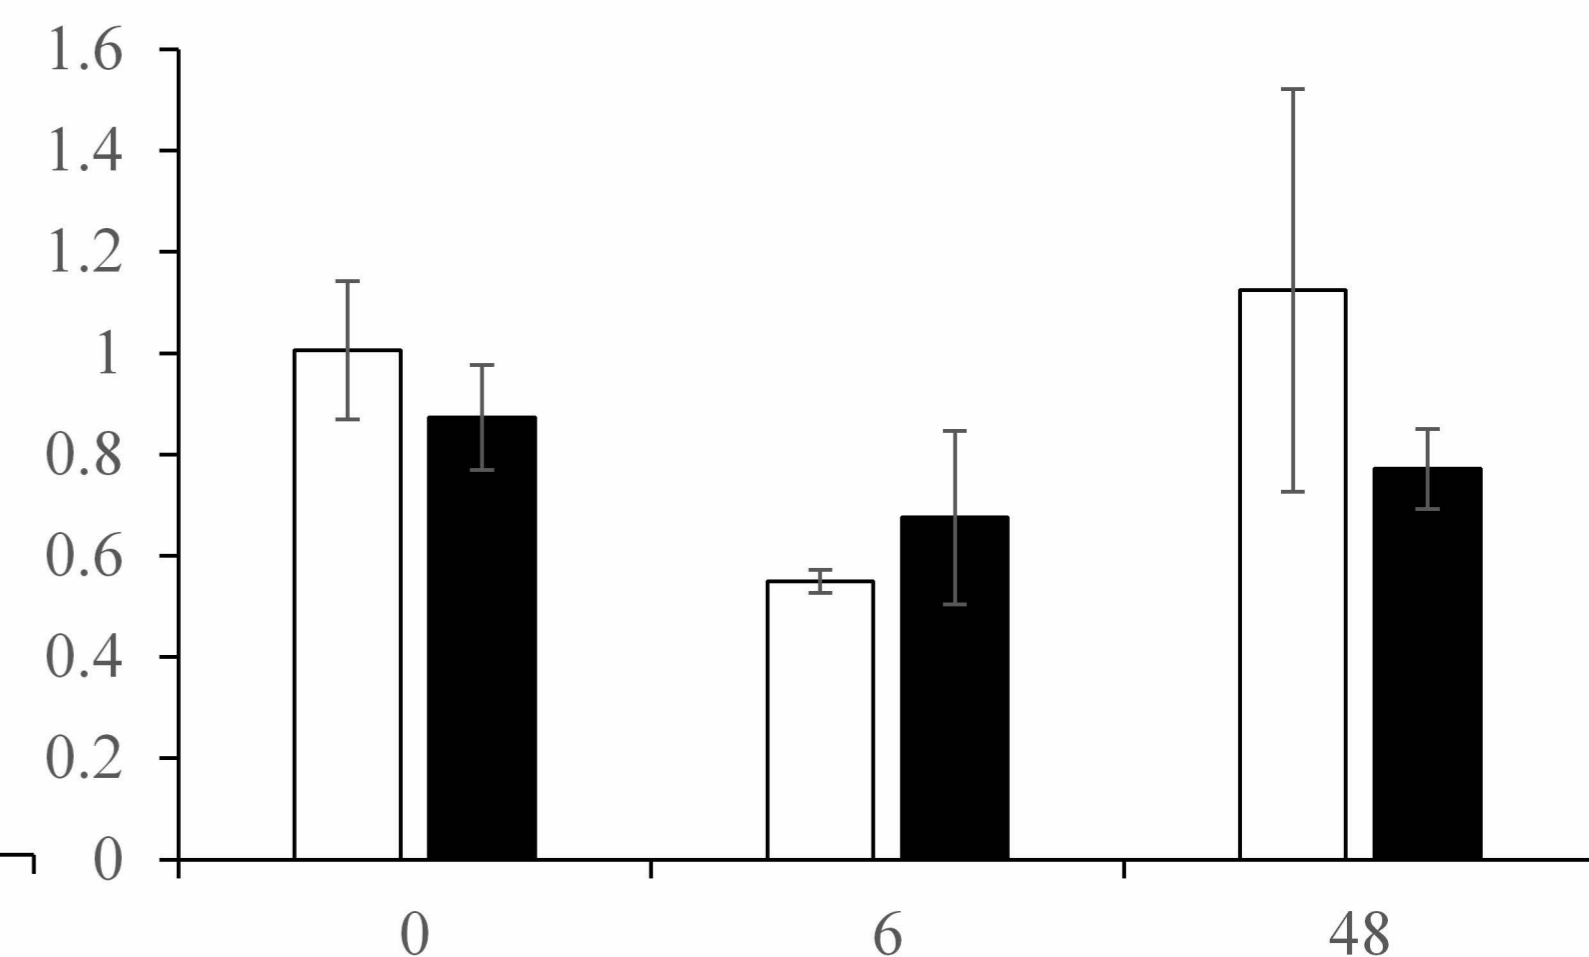

Hours after BPH infestation
